# Supplementary material for: Validation of a New Duplex Real-Time Polymerase Chain Reaction for Chlamydia trachomatis DNA Detection in Ocular Swab Samples
Source: MDPI journal article supplement (doi:10.3390/diagnostics14090892), 2024-04-25
Supplement: s1 [file s1]

**Supplemental Table S1.** List of 55 organisms tested for unspecific amplification against all six oligonucleotides described in Methods. NA = not available.

| Species                             | Strain                  |
|-------------------------------------|-------------------------|
| <i>Plasmodium falciparum</i>        | W2                      |
| <i>Trypanosoma cruzi</i>            | Dm28c                   |
| <i>Leishmania guyanensis</i>        | NA                      |
| <i>Leishmania amazonensis</i>       | NA                      |
| <i>Leishmania braziliensis</i>      | NA                      |
| <i>Leishmania infantum</i>          | NA                      |
| <i>Bordetella pertussis</i>         | Tohama I (ATCC BAA589D) |
| <i>Bordetella parapertussis</i>     | 12822 (ATCC BAA587D)    |
| <i>Staphylococcus aureus</i>        | MRSA C1A2               |
| <i>Staphylococcus aureus</i>        | MRSA C1A3               |
| <i>Enterococcus faecalis</i>        | EFC C1A4                |
| <i>Enterococcus faecalis</i>        | EFC C1A6                |
| <i>Enterococcus faecium</i>         | EFA VANA                |
| <i>Enterococcus faecium</i>         | EFA VANB                |
| <i>Staphylococcus haemolyticus</i>  | SHA 31                  |
| <i>Staphylococcus haemolyticus</i>  | SHA 35                  |
| <i>Acinetobacter baumannii</i>      | ABA 28                  |
| <i>Acinetobacter baumannii</i>      | ABA 39                  |
| <i>Streptococcus agalactidae</i>    | EGB C1A6                |
| <i>Streptococcus agalactidae</i>    | EGB C1A10               |
| <i>Staphylococcus epidermidis</i>   | SEP 8                   |
| <i>Staphylococcus epidermidis</i>   | SEP 10                  |
| <i>Stenotrophomonas maltophilia</i> | SML 440                 |
| <i>Stenotrophomonas maltophilia</i> | SML 6430                |
| <i>Enterobacter cloacae</i>         | ECL 254                 |
| <i>Enterobacter cloacae</i>         | ECL 407                 |
| <i>Proteus mirabilis</i>            | PMI 95                  |
| <i>Proteus mirabilis</i>            | PMI 341                 |
| <i>Serratia marcescens</i>          | SMA 27                  |

|                               |          |
|-------------------------------|----------|
| <i>Serratia marcescens</i>    | SMA 290  |
| <i>Enterobacter aerogenes</i> | EA 16    |
| <i>Enterobacter aerogenes</i> | EA 35    |
| <i>Klebsiella oxytoca</i>     | KOX 204  |
| <i>Klebsiella oxytoca</i>     | KOX 635  |
| <i>Morganella morganii</i>    | MMO 46C  |
| <i>Streptococcus pyogenes</i> | EGA ERMA |
| <i>Streptococcus pyogenes</i> | EGA ERMB |
| <i>Streptococcus pyogenes</i> | LMO 384L |
| <i>Streptococcus pyogenes</i> | LMO 394L |
| <i>Listeria monocytogenes</i> | SPY R4   |
| <i>Listeria monocytogenes</i> | SPY R5   |
| <i>Citrobacter freundii</i>   | CFR 866  |
| <i>Pseudomonas aeruginosa</i> | PAE 8    |
| <i>Candida albicans</i>       | CA 296   |
| <i>Candida albicans</i>       | CA297    |
| <i>Candida parapsilosis</i>   | CPA 140  |
| <i>Candida parapsilosis</i>   | CPA 159  |
| <i>Candida glabrata</i>       | CGL 56   |
| <i>Candida glabrata</i>       | CGL 57   |
| <i>Candida tropicalis</i>     | CTR 76   |
| <i>Candida tropicalis</i>     | CTR 81   |
| <i>Candida krusei</i>         | CK 27    |
| <i>Candida krusei</i>         | CK 28    |
| <i>Aspergillus fumigatus</i>  | AFU 71   |
| <i>Aspergillus fumigatus</i>  | AFU 75   |

## Supplemental Table S2. MIQE checklist.

| ITEM TO CHECK                                                        | IMPORTANCE | CHECKLIST                                                                                                                                                                                                                      |
|----------------------------------------------------------------------|------------|--------------------------------------------------------------------------------------------------------------------------------------------------------------------------------------------------------------------------------|
| <b>EXPERIMENTAL DESIGN</b>                                           |            |                                                                                                                                                                                                                                |
| Definition of experimental and control groups                        | E          | 1. Experimental groups: 62 samples (50 from endemic area and 12 from non-endemic area)<br>2. Control groups: Extracted commercial DNA; Synthetic double strand DNA; 50 pre-characterized samples (30 positive and 20 negative) |
| Number within each group                                             | E          | Yes (see above)                                                                                                                                                                                                                |
| Assay carried out by core lab or investigator's lab?                 | D          | Investigator's lab                                                                                                                                                                                                             |
| Acknowledgement of authors' contributions                            | D          | Yes                                                                                                                                                                                                                            |
| <b>SAMPLE</b>                                                        |            |                                                                                                                                                                                                                                |
| Description                                                          | E          | Eyelid samples collected using dry swabs                                                                                                                                                                                       |
| Volume/mass of sample processed                                      | D          | Two hundred microliters                                                                                                                                                                                                        |
| Microdissection or macrodissection                                   | E          | Not performed.                                                                                                                                                                                                                 |
| Processing procedure                                                 | E          | Swabs were placed in preserving gel, according to manufacturer's instructions                                                                                                                                                  |
| If frozen - how and how quickly?                                     | E          | Samples were not frozen.                                                                                                                                                                                                       |
| If fixed - with what, how quickly?                                   | E          | Samples were not fixed.                                                                                                                                                                                                        |
| Sample storage conditions and duration (especially for FFPE samples) | E          | Samples were stored in refrigerator until DNA extraction.<br>Extracted DNA was kept in -20 °C freezer.                                                                                                                         |
| <b>NUCLEIC ACID EXTRACTION</b>                                       |            |                                                                                                                                                                                                                                |
| Procedure and/or instrumentation                                     | E          | Silica-based spin columns                                                                                                                                                                                                      |
| Name of kit and details of any modifications                         | E          | QIAmp DNA Blood Mini kit (Qiagen, Germany) and High Pure PCR Template Preparation kit (Roche Applied Sciences, Germany)                                                                                                        |

|                                                          |    |                                                                                                                                                                                                                                                                                                           |
|----------------------------------------------------------|----|-----------------------------------------------------------------------------------------------------------------------------------------------------------------------------------------------------------------------------------------------------------------------------------------------------------|
| Source of additional reagents used                       | D  | Yes                                                                                                                                                                                                                                                                                                       |
| Details of DNase or RNase treatment                      | E  | Not performed.                                                                                                                                                                                                                                                                                            |
| Contamination assessment (DNA or RNA)                    | E  | Contamination by proteins was assessed spectrophotometrically.                                                                                                                                                                                                                                            |
| Nucleic acid quantification                              | E  | Yes                                                                                                                                                                                                                                                                                                       |
| Instrument and method                                    | E  | Nanodrop 2000c; spectrometry                                                                                                                                                                                                                                                                              |
| Purity (A260/A280)                                       | D  | Not reported.                                                                                                                                                                                                                                                                                             |
| Yield                                                    | D  | Not reported.                                                                                                                                                                                                                                                                                             |
| RNA integrity method/instrument                          | E  | Not applicable.                                                                                                                                                                                                                                                                                           |
| RIN/RQI or Cq of 3' and 5' transcripts                   | E  | Not applicable.                                                                                                                                                                                                                                                                                           |
| Electrophoresis traces                                   | D  | Not applicable.                                                                                                                                                                                                                                                                                           |
| Inhibition testing (Cq dilutions, spike or other)        | E  | Cq values for the human control target out of specified ranges were interpreted as inhibition of the reaction or failure of DNA extraction, and samples DNA were re-extracted. Non-template controls (NTC, molecular grade water) as well as trachoma-negative human DNA were routinely used as controls. |
| <b>REVERSE TRANSCRIPTION</b>                             |    |                                                                                                                                                                                                                                                                                                           |
| Complete reaction conditions                             | E  | Not applicable.                                                                                                                                                                                                                                                                                           |
| Amount of RNA and reaction volume                        | E  | Not applicable.                                                                                                                                                                                                                                                                                           |
| Priming oligonucleotide (if using GSP) and concentration | E  | Not applicable.                                                                                                                                                                                                                                                                                           |
| Reverse transcriptase and concentration                  | E  | Not applicable.                                                                                                                                                                                                                                                                                           |
| Temperature and time                                     | E  | Not applicable.                                                                                                                                                                                                                                                                                           |
| Manufacturer of reagents and catalogue numbers           | D  | Not applicable.                                                                                                                                                                                                                                                                                           |
| Cqs with and without RT                                  | D* | Not applicable.                                                                                                                                                                                                                                                                                           |
| Storage conditions of cDNA                               | D  | Not applicable.                                                                                                                                                                                                                                                                                           |
| <b>qPCR TARGET INFORMATION</b>                           |    |                                                                                                                                                                                                                                                                                                           |

|                                                           |     |                                                                                                                                                          |
|-----------------------------------------------------------|-----|----------------------------------------------------------------------------------------------------------------------------------------------------------|
| If multiplex, efficiency and LOD of each assay.           | E   | <i>C. trachomatis</i> DNA detection (ABI7500): efficiency of 92% (slope -3.52) and LOD95% of 13.04 genome equivalents per reaction                       |
| Sequence accession number                                 | E   | <i>C. trachomatis</i> cryptic plasmid DNA (accession number)<br>Human 18S rRNA gene (accession number)                                                   |
| Location of amplicon                                      | D   | Yes, Supplementary Figure S1                                                                                                                             |
| Amplicon length                                           | E   | 120 bp                                                                                                                                                   |
| <i>In silico</i> specificity screen (BLAST, etc)          | E   | Yes                                                                                                                                                      |
| Pseudogenes, retropseudogenes or other homologs?          | D   | --                                                                                                                                                       |
| Sequence alignment                                        | D   | Supplementary Figure S1                                                                                                                                  |
| Secondary structure analysis of amplicon                  | D   | --                                                                                                                                                       |
| Location of each primer by exon or intron (if applicable) | E   | Not performed.                                                                                                                                           |
| What splice variants are targeted?                        | E   | Not performed.                                                                                                                                           |
| <b>qPCR OLIGONUCLEOTIDES</b>                              |     |                                                                                                                                                          |
| Primer sequences                                          | E   | cryp05F 5'-GGCGTCGTATCAAAGATATGG-3'<br>cryp06R 5'-CGATGATTTGAGCGTGTGTA-3'<br>18S2F 5'-GAAACTGCGAATGGCTCATTAATCA-3'<br>18S2R 5'-AGAGCTAATACATGCCGACGGG-3' |
| RTPrimerDB Identification Number                          | D   | --                                                                                                                                                       |
| Probe sequences                                           | D** | cryp11P 5'-FAM-TCTCGGGTTAATGTTGCATGATGCTT-BHQ1-3'<br>18S2P 5'-HEX- TGGTTCCTTTGGTCGCTCGCTCC-BHQ1-3'                                                       |
| Location and identity of any modifications                | E   | Not applicable.                                                                                                                                          |
| Manufacturer of oligonucleotides                          | D   | IDT DNA Technologies (Coralville, USA)                                                                                                                   |
| Purification method                                       | D   | reverse phase and HPLC                                                                                                                                   |
| <b>qPCR PROTOCOL</b>                                      |     |                                                                                                                                                          |

|                                                 |   |                                                                                                                                                                                                                                                                                                                                                                                                                                             |
|-------------------------------------------------|---|---------------------------------------------------------------------------------------------------------------------------------------------------------------------------------------------------------------------------------------------------------------------------------------------------------------------------------------------------------------------------------------------------------------------------------------------|
| Complete reaction conditions                    | E | Detection of <i>C. trachomatis</i> cryptic plasmid and human 18S rRNA gene DNA was performed using the Multiplex PCR Mastermix (IBMP, Curitiba, Brazil) containing Taq DNA polymerase, 9 mM Mg-acetate, 0.8 mM dNTP (Thermo Scientific, USA), 5 µL of extracted DNA, oligonucleotides cryp05F (0.2 µM), cryp06R (0.2 µM), cryp11P (0.1 µM), 18S2F (0.1 µM), 18S2R (0.1 µM), and 18S2P (0.05 µM), in a reaction volume of 25 µL.             |
| Reaction volume and amount of cDNA/DNA          | E | Reaction volume of 25 µL and 5 µL of extracted DNA                                                                                                                                                                                                                                                                                                                                                                                          |
| Primer, (probe), Mg++ and dNTP concentrations   | E | cryp05F and cryp06R: 0.2 µM; cryp11P: 0.1 µM 18S2F and 18S2R: 0.1 µM; 18S2P: 0.05 µM 9 mM Mg-acetate 0.8 mM dNTP                                                                                                                                                                                                                                                                                                                            |
| Polymerase identity and concentration           | E | Taq DNA polymerase                                                                                                                                                                                                                                                                                                                                                                                                                          |
| Buffer/kit identity and manufacturer            | E | Inst Biologia Molecular do Parana (IBMP, Curitiba, Brazil)                                                                                                                                                                                                                                                                                                                                                                                  |
| Exact chemical constitution of the buffer       | D | --                                                                                                                                                                                                                                                                                                                                                                                                                                          |
| Additives (SYBR Green I, DMSO, etc.)            | E | Yes. None used.                                                                                                                                                                                                                                                                                                                                                                                                                             |
| Manufacturer of plates/tubes and catalog number | D | --                                                                                                                                                                                                                                                                                                                                                                                                                                          |
| Complete thermocycling parameters               | E | 95°C/10 min, and 45 x [95°C/15 sec + 60°C/1 min]], using ROX as passive fluorescence. Baseline was set from 3 to 15 for both targets. For <i>C. trachomatis</i> DNA, threshold was set to 0.1, and quantification cycle (Cq) values between 19 and 41.50 were considered positive detections. For human DNA, threshold was set to 0.1 and detections were considered positive and free of contaminants if Cq values were between 14 and 37. |
| Reaction setup (manual/robotic)                 | D | Manual                                                                                                                                                                                                                                                                                                                                                                                                                                      |
| Manufacturer of qPCR instrument                 | E | Thermo Fisher Scientific – Waltham, USA                                                                                                                                                                                                                                                                                                                                                                                                     |

|                                                          |   |                                                                                                                                                                                                                                            |
|----------------------------------------------------------|---|--------------------------------------------------------------------------------------------------------------------------------------------------------------------------------------------------------------------------------------------|
| <b>qPCR VALIDATION</b>                                   |   |                                                                                                                                                                                                                                            |
| Evidence of optimisation (from gradients)                | D | --                                                                                                                                                                                                                                         |
| Specificity (gel, sequence, melt, or digest)             | E | qPCR was validated using samples previously categorized by a distinct qPCR assay (target and instrument). Results are shown in Table II.                                                                                                   |
| For SYBR Green I, Cq of the NTC                          | E | Not applicable.                                                                                                                                                                                                                            |
| Standard curves with slope and y-intercept               | E | <i>C. trachomatis</i> DNA detection (ABI7500): slope –3.52, Y-intercept of -32.79                                                                                                                                                          |
| PCR efficiency calculated from slope                     | E | Efficiency of 92%                                                                                                                                                                                                                          |
| Confidence interval for PCR efficiency or standard error | D | Not shown.                                                                                                                                                                                                                                 |
| r <sup>2</sup> of standard curve                         | E | 98.6% (ABI7500)                                                                                                                                                                                                                            |
| Linear dynamic range                                     | E | 10 <sup>-18</sup> to 10 <sup>-12</sup> g/μL DNA                                                                                                                                                                                            |
| Cq variation at lower limit                              | E | SD of 0.91 Ct at lower limit (10 ag/μL)                                                                                                                                                                                                    |
| Confidence intervals throughout range                    | D | Not shown.                                                                                                                                                                                                                                 |
| Evidence for limit of detection                          | E | Probit calculations, described in Methods and Results.                                                                                                                                                                                     |
| If multiplex, efficiency and LOD of each assay.          | E | <i>C. trachomatis</i> DNA detection (ABI7500): efficiency of 92% (slope –3.52) and LOD95% of 13.04 genome equivalents per reaction                                                                                                         |
| <b>DATA ANALYSIS</b>                                     |   |                                                                                                                                                                                                                                            |
| qPCR analysis program (source, version)                  | E | ABI7500 software v2.0.6                                                                                                                                                                                                                    |
| Cq method determination                                  | E | Baseline was set from 3 to 15 for both targets. For <i>C. trachomatis</i> DNA, threshold was set to 0.1. For human DNA, threshold was set to 0.1.                                                                                          |
| Outlier identification and disposition                   | E | For <i>C. trachomatis</i> DNA, quantification cycle (Cq) values between 19 and 41.50 were considered positive detections. For human DNA, detections were considered positive and free of contaminants if Cq values were between 14 and 37. |
| Results of NTCs                                          | E | Non-template controls should show no amplification for both targets, whereas trachoma-negative controls                                                                                                                                    |

|                                                       |   |                                                                                                                                                |
|-------------------------------------------------------|---|------------------------------------------------------------------------------------------------------------------------------------------------|
|                                                       |   | should show positive detections for human DNA with Cq values were between 14 and 37.                                                           |
| Justification of number and choice of reference genes | E | 18S rRNA is a common reference gene for human samples.                                                                                         |
| Description of normalisation method                   | E | ROX as passive fluorescence                                                                                                                    |
| Number and concordance of biological replicates       | D | --                                                                                                                                             |
| Number and stage (RT or qPCR) of technical replicates | E | All qPCR assays in the ABI7500 system were performed in technical triplicates, except for LOD determination (8-12 replicates).                 |
| Repeatability (intra-assay variation)                 | E | Repeatability was found to be <8.8% (highest at 0.1 fg/μL) when assayed by three independent experienced operators.                            |
| Reproducibility (inter-assay variation, %CV)          | D | Reproducibility (inter-assay variation) was found to be <5.8% (highest at 0.03 fg/μL) when assayed by three independent experienced operators. |
| Power analysis                                        | D | Not performed.                                                                                                                                 |
| Statistical methods for result significance           | E | Bland-Altman analyses and Kappa coefficient calculations                                                                                       |
| Software (source, version)                            | E | R scripts                                                                                                                                      |
| Cq or raw data submission using RDML                  | D | --                                                                                                                                             |



**Supplemental Table S3.** Data used for calculating the LOD95% using commercial DNA for *C. trachomatis* serovar J in the ABI7500 instrument. Concentrations are shown as fg/ $\mu$ L. NEG = negative

| 10 <sup>4</sup> | 10 <sup>3</sup> | 10 <sup>2</sup> | 10 <sup>1</sup> | 10 <sup>0</sup> | 10 <sup>-1</sup> |       |       | 3x10 <sup>-2</sup> |       |       |
|-----------------|-----------------|-----------------|-----------------|-----------------|------------------|-------|-------|--------------------|-------|-------|
| 18.57           | 21.87           | 26.05           | 30.14           | 35.00           | 37.29            | NEG   | NEG   | NEG                | NEG   | NEG   |
| 18.81           | 22.03           | 25.76           | 30.16           | 33.64           | 37.28            | 35.88 | NEG   | NEG                | 34.70 | NEG   |
| 18.83           | 22.42           | 26.20           | 30.10           | 33.93           | 35.67            | 35.82 | NEG   | NEG                | 37.18 | NEG   |
| 18.44           | 21.23           | 25.77           | 30.20           | 34.29           | NEG              | NEG   | 35.96 | 36.35              | NEG   | NEG   |
| 18.27           | 21.32           | 25.67           | 29.92           | 34.09           | 35.72            | 37.18 | 35.17 | NEG                | NEG   | NEG   |
| 18.46           | 21.77           | 25.57           | 30.30           | 34.06           | 36.59            | 36.99 | 38.23 | NEG                | NEG   | NEG   |
| 18.12           | 21.44           | 24.75           | 30.10           | 34.52           | 37.36            | 37.22 | 35.66 | NEG                | NEG   | NEG   |
| 18.44           | 21.71           | 25.02           | 29.68           | 33.47           | 33.67            | NEG   | NEG   | NEG                | NEG   | NEG   |
| 18.61           | 21.59           | 25.50           | 29.93           | 35.42           | 39.62            | NEG   | NEG   | NEG                | NEG   | NEG   |
| 18.56           | 22.07           | 25.68           | 30.09           | 32.82           | 39.01            | NEG   | NEG   | NEG                | NEG   | NEG   |
| 18.32           | 21.43           | 25.77           | 29.78           | 33.24           | 36.71            | NEG   | NEG   | 38.13              | NEG   | NEG   |
| 18.71           | 24.65           | 16.96           | 29.87           | 35.32           | 36.29            | NEG   | NEG   | NEG                | NEG   | 41.64 |
| 18.33           | 14.57           | 25.19           | 30.49           | 34.03           | 40.55            | NEG   | NEG   | NEG                | NEG   | NEG   |
| 18.56           | 21.94           | 25.73           | 30.44           | 35.02           | 36.01            | 35.82 | NEG   | NEG                | NEG   | NEG   |
| 18.42           | 21.68           | 25.75           | 30.22           | 34.14           | 37.60            | 38.95 | NEG   | NEG                | 39.23 | NEG   |
| 18.67           | 22.15           | 25.77           | 30.18           | 34.88           | NEG              | NEG   | NEG   | NEG                | NEG   | NEG   |
| 18.62           | 21.91           | 25.94           | 29.28           | 35.18           | NEG              | NEG   | 38.86 | NEG                | NEG   | NEG   |
| 18.64           | 22.22           | 25.58           | 30.40           | 33.65           | NEG              | NEG   | NEG   | 42.64              | NEG   | 40.07 |
| 18.75           | 21.80           | 26.24           | 29.88           | 33.22           | NEG              | NEG   | 36.32 | NEG                | NEG   | NEG   |

**Supplemental Table S4.** Data used for calculating the LOD95% using synthetic DNA (gBlock®) in the ABI7500 instrument. Concentrations are shown as copies/μL. NEG = negative.

| 10 <sup>6</sup> | 10 <sup>5</sup> | 10 <sup>4</sup> | 10 <sup>3</sup> | 10 <sup>2</sup> | 10 <sup>1</sup> | 5x10 <sup>0</sup> | 3x10 <sup>0</sup> |
|-----------------|-----------------|-----------------|-----------------|-----------------|-----------------|-------------------|-------------------|
| 16.02           | 19.41           | 22.20           | 27.67           | 31.02           | 33.25           | 35.40             | 35.15             |
| 16.20           | 19.92           | 23.11           | 27.62           | 31.46           | 32.61           | 37.14             | 35.72             |
| NEG             | 19.49           | 23.05           | 27.77           | 32.18           | 36.26           | 34.62             | 35.12             |
| NEG             | 19.33           | 23.26           | 27.52           | 31.56           | 35.69           | 35.88             | 35.72             |
| NEG             | NEG             | 22.15           | 27.42           | 30.37           | 36.00           | 35.66             | 36.89             |
| NEG             | NEG             | 22.75           | 27.12           | 29.08           | NEG             | 36.11             | 35.15             |
| NEG             | NEG             | 22.55           | 28.09           | 31.89           | 33.64           | 33.62             | 35.64             |
| NEG             | NEG             | 22.57           | 27.58           | 30.99           | 36.39           | 37.15             | 34.69             |
| NEG             | NEG             | NEG             | 26.04           | 31.71           | 34.59           | 35.59             | NEG               |
| NEG             | NEG             | NEG             | 26.40           | 31.51           | 37.29           | 35.46             | 36.17             |
| NEG             | NEG             | NEG             | 26.39           | 29.89           | 33.46           | 35.83             | 35.95             |
| NEG             | NEG             | NEG             | 26.13           | 29.21           | 35.41           | 34.19             | 34.86             |
| NEG             | NEG             | NEG             | 27.54           | 30.62           | 35.21           | 36.85             | 38.30             |
| NEG             | NEG             | NEG             | 27.00           | 31.19           | 34.09           | 36.85             | 35.59             |
| NEG             | NEG             | NEG             | 26.66           | 30.60           | 34.80           | NEG               | 35.51             |
| NEG             | NEG             | NEG             | 26.76           | 30.58           | 38.73           | NEG               | 36.69             |
| NEG             | NEG             | NEG             | 26.85           | 30.63           | 34.42           | 37.62             | NEG               |
| NEG             | NEG             | NEG             | 27.43           | 31.19           | 34.52           | NEG               | 34.91             |
| NEG             | NEG             | NEG             | 27.76           | 31.40           | 34.86           | 35.72             | NEG               |
| NEG             | NEG             | NEG             | 25.70           | 31.53           | 35.38           | 35.43             | NEG               |
| NEG             | NEG             | NEG             | 27.36           | 31.01           | NEG             | 37.32             | 35.11             |
| NEG             | NEG             | NEG             | 27.36           | 29.43           | .               | 35.32             | 36.47             |

|     |     |     |       |       |       |       |       |
|-----|-----|-----|-------|-------|-------|-------|-------|
| NEG | NEG | NEG | 27.85 | 32.01 | 35.03 | .     | 36.56 |
| NEG | NEG | NEG | 27.71 | 31.22 | 34.51 | .     | 36.42 |
| NEG | NEG | NEG | 26.93 | 30.58 | 34.63 | 35.34 | .     |
| NEG | NEG | NEG | 27.09 | 30.91 | 34.85 | NEG   | .     |
| NEG | NEG | NEG | 27.01 | 30.52 | 34.93 | NEG   | .     |
| NEG | NEG | NEG | 27.53 | 30.90 | 36.67 | 37.19 | .     |
| NEG | NEG | NEG | 27.01 | 31.44 | 35.60 | NEG   | .     |
| NEG | NEG | NEG | 26.93 | 30.51 | 33.71 | 36.31 | .     |
| NEG | NEG | NEG | 27.22 | 30.16 | 33.93 | NEG   | 36.57 |
| NEG | NEG | NEG | 26.56 | 30.47 | 35.48 | 35.55 | 35.36 |
| NEG | NEG | NEG | NEG   | 31.01 | NEG   | 33.87 | NEG   |
| NEG | NEG | NEG | NEG   | 30.80 | 35.19 | 36.37 | 35.39 |
| NEG | NEG | NEG | NEG   | NEG   | 32.48 | NEG   | 36.63 |
| NEG | NEG | NEG | NEG   | NEG   | 34.05 | NEG   | 35.69 |
| NEG | NEG | NEG | NEG   | NEG   | 34.00 | 35.49 | NEG   |
| NEG | NEG | NEG | NEG   | NEG   | 33.47 | NEG   | NEG   |
| NEG | NEG | NEG | NEG   | NEG   | 34.83 | NEG   | NEG   |
| NEG | NEG | NEG | NEG   | NEG   | 35.50 | 35.65 | NEG   |
| NEG | NEG | NEG | NEG   | NEG   | 34.81 | 35.16 | 36.93 |
| NEG | NEG | NEG | NEG   | NEG   | 34.32 | 38.68 | 35.43 |
| NEG | NEG | NEG | NEG   | NEG   | 34.48 | NEG   | 35.19 |
| NEG | NEG | NEG | NEG   | NEG   | 35.15 | 35.02 | 34.78 |
| NEG | NEG | NEG | NEG   | NEG   | 34.96 | NEG   | 37.44 |
| NEG | NEG | NEG | NEG   | NEG   | 35.21 | NEG   | NEG   |
| NEG | NEG | NEG | NEG   | NEG   | 32.73 | NEG   | 34.55 |
| NEG | NEG | NEG | NEG   | NEG   | 34.82 | NEG   | 36.03 |
| NEG | NEG | NEG | NEG   | NEG   | 33.96 | NEG   | NEG   |

|     |     |     |     |     |       |     |       |
|-----|-----|-----|-----|-----|-------|-----|-------|
| NEG | NEG | NEG | NEG | NEG | 33.77 | NEG | 34.34 |
| NEG | NEG | NEG | NEG | NEG | NEG   | NEG | 34.94 |
| NEG | NEG | NEG | NEG | NEG | NEG   | NEG | 36.04 |
| NEG | NEG | NEG | NEG | NEG | NEG   | NEG | 40.37 |
| NEG | NEG | NEG | NEG | NEG | NEG   | NEG | 38.72 |

**Supplemental Table S5.** Data used for calculating the LOD95% using synthetic DNA (gBlock®) in the portable Q3NDPlus instrument. Concentrations are shown as copies/μL. NEG = negative

| 10 <sup>5</sup> | 10 <sup>4</sup> | 10 <sup>3</sup> | 10 <sup>2</sup> | 5x10 <sup>1</sup> | 2.5x10 <sup>1</sup> | 10 <sup>1</sup> | 10 <sup>0</sup> |
|-----------------|-----------------|-----------------|-----------------|-------------------|---------------------|-----------------|-----------------|
| 20.1            | 24.5            | 25.2            | 30.9            | 33.9              | 34.4                | 33.8            | NEG             |
| 20.8            | 25.2            | 26.8            | 28.0            | 35.1              | 34.8                | NEG             | NEG             |
| 19.7            | 23.8            | 25.9            | 28.6            | 34.9              | NEG                 | 33.0            | 35.5            |
| 20.0            | 24.0            | 26.2            | 29.0            | 34.4              | NEG                 | 34.8            | NEG             |
| 20.9            | 22.0            | 28.7            | 29.0            | 35.3              | 35.0                | 34.6            | NEG             |
| 20.0            | 22.6            | 29.4            | 31.3            | 32.4              | NEG                 | NEG             | NEG             |
| 21.0            | 22.5            | 29.1            | 30.1            | 34.9              | NEG                 | 33.3            | NEG             |
| 20.3            | 25.5            | 27.7            | 31.9            | NEG               | NEG                 | NEG             | NEG             |
| 22.2            | 25.8            | 27.7            | 32.3            | 34.4              | 35.1                |                 | 37.8            |
| 22.4            | 27.4            | 27.5            | 30.0            | 34.8              | 37.5                |                 |                 |
|                 | 26.7            | 26.8            | 31.1            | NEG               | 35.8                |                 |                 |
|                 | 26.9            | 22.8            | 32.5            | NEG               | 36.3                |                 |                 |
|                 | 26.3            | 22.8            |                 | 33.4              | NEG                 |                 |                 |
|                 | 26.0            | 22.6            |                 | 32.3              | 36.9                |                 |                 |
|                 | 25.4            | 22.6            |                 | 33.3              | NEG                 |                 |                 |
|                 |                 | 29.4            |                 |                   | NEG                 |                 |                 |
|                 |                 | 29.9            |                 |                   | NEG                 |                 |                 |
|                 |                 | 29.0            |                 |                   | NEG                 |                 |                 |
|                 |                 | 29.5            |                 |                   | NEG                 |                 |                 |
|                 |                 | 29.3            |                 |                   | 32.8                |                 |                 |
